# Supplementary material for: Importance of Gradients in Membrane Properties and Electrical Coupling in Sinoatrial Node Pacing
Source: PubMed Central journal article supplement (PMC3997424; doi:10.1371/journal.pone.0094565), 2014-04-23
Supplement: pone.0094565.s007.pdf [file pone.0094565.s007.pdf]

|                        | Original   | Modified   |
|------------------------|------------|------------|
| $g_{\text{Na}}$        | 1.4 (nL/s) | 1.4 (pL/s) |
| $g_{\text{Ca,L}}$ (nS) | 4.0        | 4.0        |
| $g_{\text{Ca,T}}$ (nS) | 6.0        | 6.0        |
| $g_{\text{to}}$ (nS)   | 50.002     | 35.0       |
| $g_{\text{K,r}}$ (nS)  | 3.5        | 7.0        |
| $g_{\text{K,s}}$ (nS)  | 2.5        | 5.0        |
| $g_{\text{K1}}$ (nS)   | 5.088      | 10.0       |
| $I_{\text{CaP}}$ (nA)  | 9.509      | 9.509      |
| $g_{\text{NaCa}}$ (nS) | 0.020      | 0.010      |
| $g_{\text{B,Na}}$ (nS) | 0.064      | 0.064      |
| $g_{\text{B,Ca}}$ (nS) | 0.031      | 0.031      |
| $g_{\text{B,Cl}}$ (nS) | 0.120      | 0.120      |
