# Supplementary material for: Importance of Gradients in Membrane Properties and Electrical Coupling in Sinoatrial Node Pacing
Source: PubMed Central journal article supplement (PMC3997424; doi:10.1371/journal.pone.0094565), 2014-04-23
Supplement: pone.0094565.s010.pdf [file pone.0094565.s010.pdf]

|            | Centre                   | Periphery                |
|------------|--------------------------|--------------------------|
| $V_m$ (mV) | -57.7016                 | -80.3264                 |
| $m$        | 0.187524                 | 0.0472189                |
| $h_1$      | 0.102462                 | 0.396606                 |
| $h_2$      | 0.0135051                | 0.0232174                |
| $d_L$      | $2.65806 \times 10^{-3}$ | $6.74224 \times 10^{-5}$ |
| $f_L$      | 0.934503                 | 0.967884                 |
| $d_T$      | 0.0454625                | $1.70626 \times 10^{-3}$ |
| $q$        | 0.0298879                | $9.98983 \times 10^{-3}$ |
| $r$        | 0.241183                 | 0.245692                 |
| $p_{a,f}$  | 0.260179                 | 0.309033                 |
| $p_{a,s}$  | 0.585665                 | 0.357238                 |
| $p_i$      | 0.979192                 | 0.991669                 |
| $x_s$      | 0.156332                 | 0.0745617                |
| $y$        | 0.0266851                | 0.0228544                |
